# Supplementary material for: A Heterologous Viral Protein Scaffold for Chimeric Antigen Design: An Example PCV2 Virus Vaccine Candidate
Source: PubMed Central journal article supplement (PMC7232224; doi:10.3390/v12040385), 2020-03-31
Supplement: viruses-12-00385-s001.pdf [file viruses-12-00385-s001.pdf]

**Supplementary materials.**

```
>PCV2 Chile Rancagua2007 Cap gene
ATGACGTATCCAAGGAGGCGTTACCGGAGAAGAAGACACCGCCCCCGCAGCCA
TCTTGGCCAGATCCTCCGCCGCCGCCCTGGCTCGTCCACCCCCGCCACCGTTA
CCGCTGGAGAAGGAAAAATGGCATCTTCAACACCCGCTCTCCCGCACCTTCG
GATATACTATCAAGCGAACCACAGTCAAAACGCCCTCCTGGGCGGTGGACATG
ATGAGATTCAATATTAATGACTTTCTTCCCCCAGGAGGGGGCTCAAACCCCCGC
TCTGTGCCCTTTGAATACTACAGAATAAGAAAGGTTAAGGTTGAATTCTGGCCC
TGCTCCCCGATCACCCAGGGTGACAGGGGAGTGGGCTCCAGTGCTGTTATTCTA
GATGATAACTTTGTAACAAAGGCCACAGCCCTCACCTATGACCCCTATGTAAAC
TACTCCTCCCGCCATAACCATAACCCAGCCCTTCTCCTACCACTCCCGCTACTTTA
CCCCCAAACCTGTCCTAGATTCCACTATTGATTACTTCCAACCAAACAACAAAA
GAAATCAGCTGTGGCTGAGACTACAAACTGCTGGAAATGTAGACCACGTAGGC
CTCGGCACTGCGTTCGAAAACAGTATATACGACCAGGAATACAATATCCGTGT
AACCATGTATGTACAATTCAGAGAATTTAATCTTAAAGACCCCCCACTTAACCC
TAA

>PCV2 Chile Rancagua2007 Cap protein
MTYPRRRYRRRRHRPRSHLGQILRRRPWLVHPRHRYRWRRKNGIFNTRLSRTFGY
TIKRTTVKTPSWAVDMMRFNINDFLPPGGGSNPRSVPFYRIRKVKVEFWPCSPIT
QGDRGVGSSAVILDDNFVTKATALTYDPYVNYSSRHITQPFSYHSRYFTP KPVL D
STIDYFQPNNKRNLWLRLQTAGNVDHVGLGTAFENSIYDQEYNIRVTMYVQFRE
FNLKDPPLNP*
```

**Figure S1.** Sequence of a viral isolate of a representative Chilean strain. Up: nucleotide sequence of the gene, "PCV2 Chile Rancagua2007 Cap gene ". Down: amino acid sequence of the Cap protein, "PCV2 Chile Rancagua2007 Cap protein"

**Table S1.** Sequences of porcine circovirus type 2 (PCV2) included in this study. Genbank accession numbers (GAN) and genotypes (G) according to Franzo *et al.* (2015). Asterisk (\*) indicates that both capsid and replicase gene sequences were obtained from the same Genbank entry and used in the concatenated data set.

| GAN       | G | GAN       | G | GAN       | G | GAN       | G | GAN       | G | GAN       | G |
|-----------|---|-----------|---|-----------|---|-----------|---|-----------|---|-----------|---|
| AB361566  | b | AY122275* | b | AY484412* | b | DQ218419* | b | EF190943  | b | EF524529* | b |
| AB361567  | b | AY129154  | a | AY484413* | b | DQ218420* | b | EF197987  | b | EF524539* | d |
| AB361568  | a | AY129155  | a | AY484414* | b | DQ218421* | b | EF210106* | b | EF560608  | b |
| AB361569  | b | AY146991* | a | AY484415* | b | DQ220733* | b | EF371518  | a | EF560609  | b |
| AB361570  | a | AY146992* | a | AY484416* | b | DQ220737* | b | EF371519  | a | EF560610  | b |
| AB361571  | a | AY146993* | a | AY510375* | d | DQ220738* | b | EF371520  | a | EF565342* | b |
| AB361572  | a | AY180396* | a | AY536755* | b | DQ233257* | b | EF371521  | a | EF565344* | b |
| AB361573  | a | AY180397* | a | AY536756* | b | DQ364650* | b | EF371522  | a | EF565346* | b |
| AB361574  | a | AY181945* | b | AY556473* | d | DQ397521* | a | EF371523  | a | EF565347* | b |
| AB361576  | a | AY181947* | d | AY556475* | b | DQ534442  | b | EF371524  | a | EF565349* | b |
| AB361577  | a | AY181948* | a | AY556476* | d | DQ629113* | a | EF371525  | a | EF565350* | b |
| AB361582  | a | AY188355* | b | AY578327  | b | DQ629114* | a | EF371528  | b | EF565352* | b |
| AB361583  | a | AY217743* | b | AY579893* | b | DQ648031* | b | EF371529  | b | EF565354* | b |
| AB361584  | b | AY256455* | a | AY596822  | b | DQ861898* | b | EF371530  | b | EF565355* | b |
| AB361585  | b | AY256456* | a | AY596823* | b | DQ861900* | b | EF371531  | b | EF565356* | b |
| AB426905* | a | AY256457* | b | AY604430* | b | DQ861901* | b | EF371532  | b | EF565357* | b |
| AB462382  | b | AY256458* | a | AY613854* | b | DQ870484* | a | EF371533  | b | EF565358* | b |
| AB462383  | a | AY256459* | a | AY613906  | b | DQ910865* | b | EF371534  | b | EF565359* | b |
| AB462384  | d | AY256460* | b | AY641542* | b | DQ910866* | b | EF371535  | b | EF565360* | b |
| AB462385  | a | AY288133* | b | AY651850* | b | DQ915584* | b | EF371536  | b | EF565361* | b |
| AB462387  | b | AY288134* | b | AY672600  | a | DQ915585* | b | EF371537  | b | EF565362* | b |
| AB462388  | a | AY288135* | a | AY672601  | a | DQ915586* | b | EF371538  | b | EF565363* | b |
| AB462389  | b | AY291316* | b | AY678532* | b | DQ915587* | b | EF371539  | b | EF565364* | b |
| AB462390  | b | AY291317* | d | AY682990* | b | DQ915588* | a | EF371540  | b | EF565366* | b |
| AB462391  | b | AY321982* | b | AY682991* | d | DQ997815* | b | EF371541  | b | EF565367* | b |
| AF201305* | a | AY321983* | b | AY682992* | b | EF064149  | b | EF371542  | b | EF565368* | b |
| AF201306* | a | AY321984* | b | AY682994* | d | EF064150  | a | EF371544  | b | EF592575* | b |
| AF201307* | a | AY321985* | b | AY682996* | d | EF067852  | b | EF371546  | b | EF592576* | b |
| AF201308* | a | AY321986* | b | AY686762* | b | EF067853  | a | EF371548  | b | EF619037* | b |
| AF201309* | a | AY321987* | b | AY686763* | d | EF184220  | a | EF371550  | b | EF619971  | b |
| AF201310* | a | AY321988* | b | AY686764* | b | EF184221  | a | EF371551  | a | EF675230* | d |
| AF201311* | b | AY321989* | b | AY686765* | d | EF184222  | a | EF394774* | a | EF675234* | b |
| AF264038* | a | AY321990* | b | AY691169* | b | EF184223  | a | EF394775* | a | EF675235* | b |
| AF264039* | a | AY321991* | b | AY691679* | b | EF184224  | a | EF394776* | a | EF675236* | b |
| AF264040* | a | AY321992* | b | AY699793* | a | EF184225  | a | EF421967* | b | EF675237* | b |
| AF264041* | a | AY321995* | b | AY732494* | b | EF184226  | b | EF421968* | b | EF675239* | b |
| AF264042* | a | AY321996* | b | AY754022* | a | EF184227  | b | EF421969* | b | EF675241* | d |
| AF264043* | a | AY321997* | b | AY849938* | b | EF184228  | b | EF421970* | b | EF675242* | b |
| AF381175* | a | AY321999* | b | AY874163* | b | EF190922  | b | EF421971* | b | EF675244* | b |
| AF381176* | a | AY322000* | b | AY874164* | a | EF190923  | b | EF421973* | b | EF990645  | d |
| AF381177* | a | AY322002* | b | AY874165* | a | EF190924  | b | EF452350* | b | EU136711* | a |
| AF454546* | a | AY322003* | b | AY874166* | a | EF190925  | b | EF467928  | b | EU136712* | b |
| AF465211* | a | AY322004* | a | AY874168* | b | EF190926  | b | EF493837* | b | EU136713* | b |
| AF520783* | a | AY325495* | a | AY885225  | b | EF190928  | b | EF493838* | b | EU136714* | b |
| AF544024* | a | AY424401* | a | AY916791* | b | EF190929  | b | EF493839* | b | EU136715* | b |
| AJ623306* | b | AY424402* | a | AY943819* | d | EF190930  | b | EF493840* | b | EU136716* | b |
| AY094619* | a | AY424403* | a | DQ104419  | a | EF190932  | b | EF493841* | b | EU136717* | b |
| AY099495* | a | AY424404* | b | DQ104421* | a | EF190933  | b | EF493842* | b | EU136718* | b |
| AY099496* | a | AY424405* | b | DQ104422* | b | EF190934  | b | EF524515* | b | EU136719* | b |
| AY099497* | a | AY484407* | b | DQ104423* | a | EF190935  | b | EF524519* | b | EU136720* | b |

|           |   |           |   |           |   |          |   |           |   |           |   |
|-----------|---|-----------|---|-----------|---|----------|---|-----------|---|-----------|---|
| AY099498* | a | AY484408* | b | DQ195679* | b | EF190937 | b | EF524521* | b | EU148503* | c |
| AY099499* | a | AY484410* | d | DQ201641* | b | EF190939 | b | EF524525* | b | EU148504* | c |
| AY099500* | a | AY484411* | b | DQ201642* | b | EF190942 | b | EF524527* | b | EU148505* | c |

| GAN       | G | GAN       | G | GAN       | G | GAN       | G | GAN       | G | GAN       | G |
|-----------|---|-----------|---|-----------|---|-----------|---|-----------|---|-----------|---|
| EU148507* | a | EU886637* | b | FJ667587* | b | GU247987* | b | HM142894* | d | HQ395029* | d |
| EU257512* | b | EU909686* | d | FJ667588* | d | GU247988* | b | HM142895* | d | HQ395032* | d |
| EU257513* | b | EU909688* | b | FJ667589* | b | GU247989* | b | HM142896* | d | HQ395033* | d |
| EU257514* | b | EU980089  | b | FJ667590* | d | GU247990* | b | HM142899* | d | HQ395036* | b |
| EU257515* | b | EU980090  | b | FJ667591* | b | GU247991* | b | HM161710* | d | HQ395037* | d |
| EU283329* | b | EU980094  | b | FJ667592* | b | GU247992* | b | HM161711* | d | HQ395038* | d |
| EU3469794 | b | FJ158603* | b | FJ667593* | b | GU252370* | d | HM535639  | b | HQ395039* | b |
| EU346945* | b | FJ158604* | d | FJ667594* | b | GU325760* | d | HM535640  | d | HQ395041* | d |
| EU350548  | b | FJ158606* | b | FJ667595* | b | GU325762* | d | HM535641  | d | HQ395042* | d |
| EU366324* | b | FJ158607* | d | FJ667596* | b | GU325763* | d | HM565923  | b | HQ395043* | d |
| EU366325* | b | FJ218001* | a | FJ712215* | d | GU325764* | b | HM565924  | b | HQ395044* | d |
| EU366326* | b | FJ233908* | a | FJ712216* | d | GU325766* | b | HM623764* | a | HQ395046* | b |
| EU408780* | b | FJ384965  | b | FJ716703* | b | GU325767* | d | HM641752* | b | HQ395048* | d |
| EU418627* | b | FJ384966  | b | FJ716704* | b | GU325768* | d | HM755880  | d | HQ395050* | d |
| EU503031* | b | FJ384967  | b | FJ755686  | b | GU325769* | d | HM755881  | d | HQ395052* | d |
| EU503032* | b | FJ384968  | b | FJ870967* | a | GU325770* | d | HM776437* | d | HQ395053* | d |
| EU503033* | b | FJ384969  | b | FJ870968* | a | GU370064* | a | HM776438* | b | HQ395054* | a |
| EU503034* | b | FJ426398* | d | FJ870969* | b | GU574204  | d | HM776439* | d | HQ395055* | d |
| EU503035* | b | FJ483938* | a | FJ870970* | d | GU808525* | d | HM776440* | d | HQ395057* | b |
| EU503037* | b | FJ501957* | a | FJ870971* | d | GU938302* | d | HM776441* | d | HQ395059* | d |
| EU503038* | b | FJ594471* | d | FJ870972* | d | GU938303* | b | HM776442* | b | HQ395061* | d |
| EU503039* | b | FJ598044* | b | FJ870973* | d | HF542107* | b | HM776444* | b | HQ591365* | b |
| EU503040* | b | FJ598045* | d | FJ870974* | b | HM003569* | b | HM776445* | b | HQ591366* | a |
| EU518247  | b | FJ623185* | b | FJ870976* | b | HM003570* | b | HM776446* | b | HQ591367* | b |
| EU521707* | b | FJ644555  | b | FJ905462* | b | HM009329  | b | HM776447* | d | HQ591368* | b |
| EU521708* | b | FJ644556  | b | FJ905464* | b | HM009332  | b | HM776448* | b | HQ591370* | b |
| EU521709  | b | FJ644557  | b | FJ905468* | b | HM009333  | b | HM776449* | d | HQ591371* | b |
| EU545543* | b | FJ644558  | b | FJ905469* | b | HM009334  | b | HM776451* | b | HQ591372* | b |
| EU545544* | b | FJ644559  | b | FJ905471* | a | HM009335  | b | HM776453* | d | HQ591373* | b |
| EU545545* | b | FJ644560  | d | FJ935780* | b | HM009336* | b | HQ113117* | d | HQ591374* | a |
| EU545546* | b | FJ644561  | b | FJ948167* | b | HM009337* | a | HQ113118* | d | HQ591375* | b |
| EU545547* | b | FJ644562  | b | FJ948168* | d | HM027579* | d | HQ113119* | d | HQ591376* | b |
| EU545548* | b | FJ644563  | b | FN398023* | b | HM027580* | d | HQ113120* | b | HQ591377* | b |
| EU545549* | b | FJ644919  | b | FN398025* | b | HM030908  | b | HQ113121* | b | HQ591378* | b |
| EU545550* | b | FJ644920  | b | FN398026  | b | HM038016* | b | HQ231328* | b | HQ591380* | b |
| EU545551* | b | FJ644921  | b | FR823451* | a | HM038017* | d | HQ378157  | d | HQ650833* | d |
| EU555439* | b | FJ644922  | b | GQ174519* | b | HM038018* | b | HQ378158* | d | HQ693092  | b |
| EU589623  | b | FJ644923  | b | GQ227412* | b | HM038019* | b | HQ378159* | b | HQ693093* | d |
| EU656143* | b | FJ644924  | b | GQ359008* | b | HM038020* | b | HQ378161* | b | HQ735207  | b |
| EU684164* | b | FJ644925  | b | GQ359009* | d | HM038021* | b | HQ378162  | b | HQ738639* | b |
| EU747125  | a | FJ644926  | b | GQ359010* | d | HM038022* | b | HQ378163  | b | HQ738640* | b |
| EU755371  | b | FJ644929  | d | GQ359011* | d | HM038023* | b | HQ378164  | a | HQ738641* | b |
| EU755372  | b | FJ644930  | b | GQ449672* | b | HM038024* | b | HQ378165  | a | HQ831519* | a |
| EU755373  | b | FJ644931  | d | GQ915288* | d | HM038025* | b | HQ378166  | a | HQ831520* | a |
| EU755374  | b | FJ660967* | b | GQ915289* | b | HM038026* | b | HQ395019* | b | HQ831521* | b |
| EU755375  | b | FJ660968* | b | GQ995582  | b | HM038027* | b | HQ395020* | b | HQ831522* | a |
| EU755376  | b | FJ660970* | b | GU001710* | d | HM038028* | b | HQ395021* | d | HQ831525* | b |
| EU755377  | b | FJ660971* | b | GU049340* | a | HM038029* | b | HQ395022* | d | HQ831526* | b |

|           |   |           |   |           |   |           |   |           |   |           |   |
|-----------|---|-----------|---|-----------|---|-----------|---|-----------|---|-----------|---|
| EU755378  | b | FJ667582* | d | GU083582* | b | HM038030* | d | HQ395023* | d | HQ831528* | b |
| EU755379  | b | FJ667583* | d | GU083583* | d | HM038031* | d | HQ395024* | d | HQ831530* | b |
| EU755380  | b | FJ667584* | b | GU124593* | d | HM038033* | a | HQ395025* | d | HQ831531* | b |
| EU755381  | b | FJ667585* | d | GU233804* | b | HM038034* | a | HQ395027* | b | HQ831532* | b |
| EU780074* | b | FJ667586* | d | GU244506* | b | HM102350* | d | HQ395028* | b | HQ831533* | a |

| GAN       | G | GAN       | G | GAN       | G | GAN       | G |
|-----------|---|-----------|---|-----------|---|-----------|---|
| HQ831534* | b | JF927982  | b | JN382190  | b | JX912914* | d |
| HQ831535* | b | JF927983  | b | JN382191  | b | JX912915* | d |
| HQ831536* | a | JF927984  | d | JN382192  | b | JX945575* | b |
| HQ831537* | b | JF927985  | d | JN411094  | d | JX945576* | b |
| HQ831538* | b | JF927986  | d | JN411095  | d | JX945577* | b |
| HQ831539* | a | JF927988  | d | JN411096  | d | JX948769* | d |
| HQ831540* | b | JF927989  | d | JN411099  | d | JX948770* | d |
| JF272497* | b | JF927990  | b | JN411100  | d | JX948771* | d |
| JF272498* | d | JF928002* | d | JN615187* | d | JX948775* | d |
| JF272499* | b | JF928004* | d | JN644769  | b | JX948776* | d |
| JF317565* | b | JF928005* | b | JN644770  | b | JX948777* | d |
| JF317566* | b | JF928006* | d | JN644771  | b | JX948778* | d |
| JF317568* | b | JN006445  | d | JN660055* | d | JX948781* | d |
| JF317571* | b | JN006448  | d | JN662673  | b | JX948782* | d |
| JF317573* | b | JN006451  | b | JN662675  | b | JX948783* | d |
| JF317575* | b | JN006452  | b | JN662684  | b | JX948784* | b |
| JF317577* | b | JN006453  | b | JN989553  | b | JX948785* | d |
| JF317578* | b | JN006454  | b | JN989554  | b | JX948786* | d |
| JF317583* | b | JN006455  | b | JN989555  | b | JX982219* | d |
| JF317584* | a | JN006456  | b | JN989556  | b | JX982220* | d |
| JF317586* | d | JN006457  | b | JN989557  | b | JX982221* | d |
| JF317588* | b | JN006458  | b | JQ002671* | d | JX982222* | d |
| JF682791* | a | JN006462  | b | JQ002672* | b | JX982224* | d |
| JF682792* | b | JN006463  | b | JQ181585* | b | JX982226* | d |
| JF682793* | a | JN006464  | b | JQ181589* | b | JX982227* | d |
| JF682794* | a | JN006465  | a | JQ181600* | d | JX982228* | d |
| JF683387  | a | JN119255* | d | JQ387582  | b | KC153106* | d |
| JF683388  | a | JN119256* | b | JQ390467* | d | KC188796* | a |
| JF683389  | d | JN119257  | d | JQ413808* | d | KC249977* | d |
| JF683391  | a | JN133304* | a | JQ653449* | d | KC447454* | d |
| JF683392  | d | JN133305  | a | JQ809463* | d | KC473166* | d |
| JF683394  | d | JN176181* | d | JQ809464* | d | KC473167* | d |
| JF683398  | a | JN382157  | a | JQ866914  | b | KC473168* | d |
| JF683399  | d | JN382159  | b | JQ866915  | b | KC527542* | d |
| JF683400  | b | JN382161  | a | JQ866918  | b | KC533811* | d |
| JF683401  | d | JN382162  | a | JQ866919  | b | KC533812* | d |
| JF683402  | d | JN382164  | b | JQ994269* | a | KC618389* | a |
| JF683403  | a | JN382165  | b | JX204386* | d | KC800637* | d |
| JF683404  | d | JN382166  | b | JX406419* | d | KC800638* | d |
| JF683405  | d | JN382168  | b | JX406420* | d | KC800639* | d |
| JF683406  | b | JN382169  | b | JX406421* | d | KC800640* | d |
| JF683408  | d | JN382171  | b | JX406422* | d | KC800641* | d |
| JF690916* | b | JN382172  | b | JX406425  | d | KC800642* | d |
| JF690917* | b | JN382173  | b | JX512854* | a | KC800643* | d |

|           |   |          |   |           |   |           |   |
|-----------|---|----------|---|-----------|---|-----------|---|
| JF690919* | b | JN382174 | b | JX512858* | b | KC800644* | d |
| JF690920* | b | JN382175 | b | JX512859* | b | KC800645* | d |
| JF718784* | d | JN382176 | b | JX512860* | b | KC800646* | d |
| JF899334* | d | JN382177 | a | JX534236* | b | KC835190* | b |
| JF927976  | b | JN382180 | b | JX534237* | b | KC835192* | b |
| JF927978  | a | JN382184 | b | JX535296* | d | KC835193* | b |
| JF927979  | a | JN382185 | b | JX535297* | d | KC860786* | d |
| JF927980  | b | JN382186 | b | JX678978* | b |           |   |
| JF927981  | b | JN382188 | d | JX679498* | d |           |   |

**Table S2.** Structural analysis by online TopSearch software. The S score corresponds to the number of residues that have structural similarity between each alignment.  $S_q$ : indicates the percentage of homologous residues of the structure 3r0r with each of the alignments.  $S_t$ : indicates the percentage of homologous residues of each structural homolog aligned with pdb: 3r0r.

| PDB ID | Alignment size | S     | $S_q$ | $S_t$ |
|--------|----------------|-------|-------|-------|
| 3r0r   | 194            | 194   | 100   | 100   |
| 1c8n   | 144            | 115.4 | 59.5  | 52.7  |
| 1aym   | 114            | 93.6  | 48.2  | 11.6  |
| 1f2n   | 136            | 114.4 | 59.0  | 19.4  |

|                     |     |        |        |       |         |       |       |           |
|---------------------|-----|--------|--------|-------|---------|-------|-------|-----------|
|                     |     | 10     | 20     | 30    | 40      | 50    | 60    |           |
| <u>gi 340707970</u> | 37  | NGIFN  | TRLSR  | TFGYT | IKRRT   | TvktP | SWAVD | MMRFN     |
| <u>1AYM 1</u>       | 67  | vesFL  | GRSGC  | IHESV | LDIVD   | n-yND | QSFTK | WNINL     |
| <u>1C8N C</u>       | 86  | GNSTV  | VSNSEL | ILNLT | Pi----  | aLAYT | VQSLP | LIATQ     |
| <u>1F2N C</u>       | 52  | SNTW   | PLHSV  | EFLAD | fkrs--- | stsAD | ATTYD | CVPFN     |
|                     |     |        |        |       |         |       |       | prvw---   |
|                     |     |        |        |       |         |       |       | slarC     |
|                     |     |        |        |       |         |       |       | YSMwK     |
|                     |     |        |        |       |         |       |       | PTR 102   |
|                     |     | 70     | 80     | 90    | 100     | 110   | 120   |           |
| <u>gi 340707970</u> | 96  | VKVE   | FWPC   | SPIT- | QGDRG   | VGS   | SAVIL | DDNFV     |
| <u>1AYM 1</u>       | 121 | EITM   | VPSV   | AAKDg | HIGHI   | VQM   | YMYV  | PPGAP     |
| <u>1C8N C</u>       | 137 | LRII   | YSPK   | CPTT- | T--SG   | TAM   | CLSY  | DRNDV     |
| <u>1F2N C</u>       | 103 | WDVV   | YLPE   | VSAT- | V--AG   | SIEM  | CFLY  | DYADT     |
|                     |     |        |        |       |         |       |       | IPRY---   |
|                     |     |        |        |       |         |       |       | TGKM      |
|                     |     |        |        |       |         |       |       | SRTAG     |
|                     |     |        |        |       |         |       |       | FVTSS     |
|                     |     |        |        |       |         |       |       | VWY 151   |
|                     |     | 130    | 140    | 150   | 160     | 170   | 180   |           |
| <u>gi 340707970</u> | 151 | -----  | Y----- | ----- | HSRY    | FTP   | KPV   | Ldsti     |
| <u>1AYM 1</u>       | 175 | -----  | P----- | ----- | FPRF    | SLP   | FLSI  | -----     |
| <u>1C8N C</u>       | 191 | ailn   | tdvt   | ptsA  | -----   | IYVD  | VDV   | TRFD      |
| <u>1F2N C</u>       | 152 | -----  | Gaeg   | chl   | sggs    | sarna | VVAS  | MDCsr     |
|                     |     |        |        |       |         |       |       | -----     |
|                     |     |        |        |       |         |       |       | vGWK      |
|                     |     |        |        |       |         |       |       | Rvtss 185 |
|                     |     | 190    | 200    | 210   | 220     | 230   |       |           |
| <u>gi 340707970</u> | 185 | a----- | GNVD   | HVGL  | GTAF-   | ENSI  | ---YD | QE-       |
| <u>1AYM 1</u>       | 195 | dgyd   | gdty   | ksry  | gtvV    | TNDM  | GTLC  | SRI-      |
| <u>1C8N C</u>       | 222 | taaf   | aa---  | ltaf  | dqnq    | FCP   | CTV   | HIGS-     |
| <u>1F2N C</u>       | 186 | ipss   | -----  | vdpn  | vvt     | ILP   | ARL   | AVRS      |
|                     |     |        |        |       |         |       |       | IKPT---   |
|                     |     |        |        |       |         |       |       | VSDT      |
|                     |     |        |        |       |         |       |       | pGKLY     |
|                     |     |        |        |       |         |       |       | VIAS      |
|                     |     |        |        |       |         |       |       | MV--      |
|                     |     |        |        |       |         |       |       | LrDP      |
|                     |     |        |        |       |         |       |       | VDP 234   |

**Figure S2:** Sequences alignment of secondary structure information. Alignment between 3r0r and 1aym, 1c8n and 1f2n proteins. The light gray residues were eliminated from the alignment.

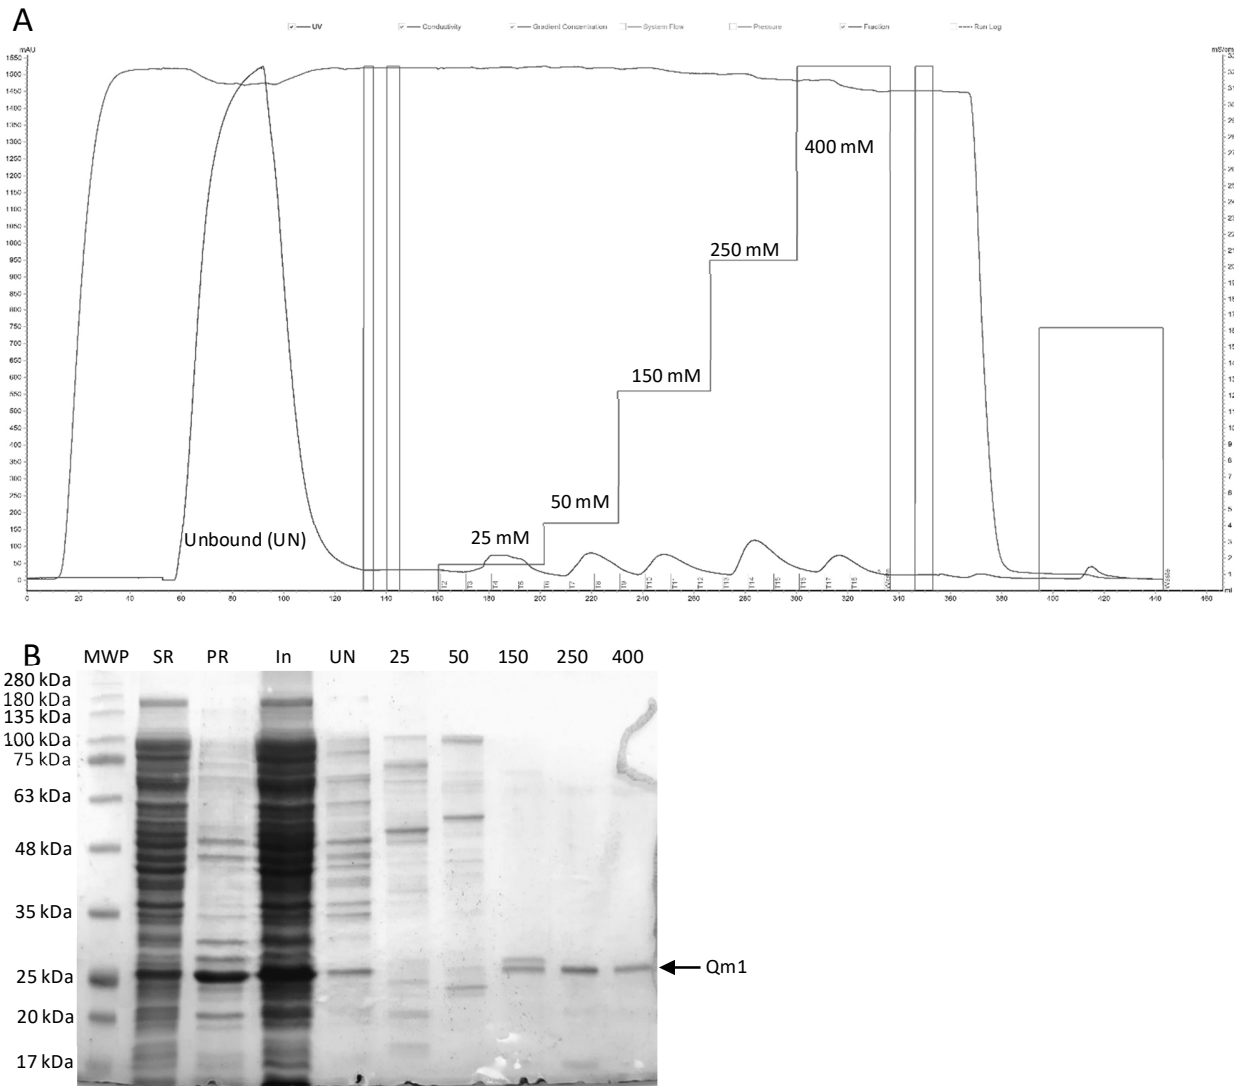

**Figure S3.** Qm1 purification by IMAC. **A)** Chromatogram resulting from the IMAC Qm1 purification. UN: unbound proteins, 25, 50, 150, 250 and 400 mM correspond to the imidazole concentration in the elution buffer respectively. **B)** SDS-PAGE Coomassie blue staining on reducing condition MWP: molecular weight pattern; SR: supernatant of rupture; PR: pellet of rupture; In: initial sample; UN: unbound protein sample; 25, 50, 150, 250 and 400: samples obtained from IMAC purification. 20  $\mu$ L per sample was used in each case in both conditions.

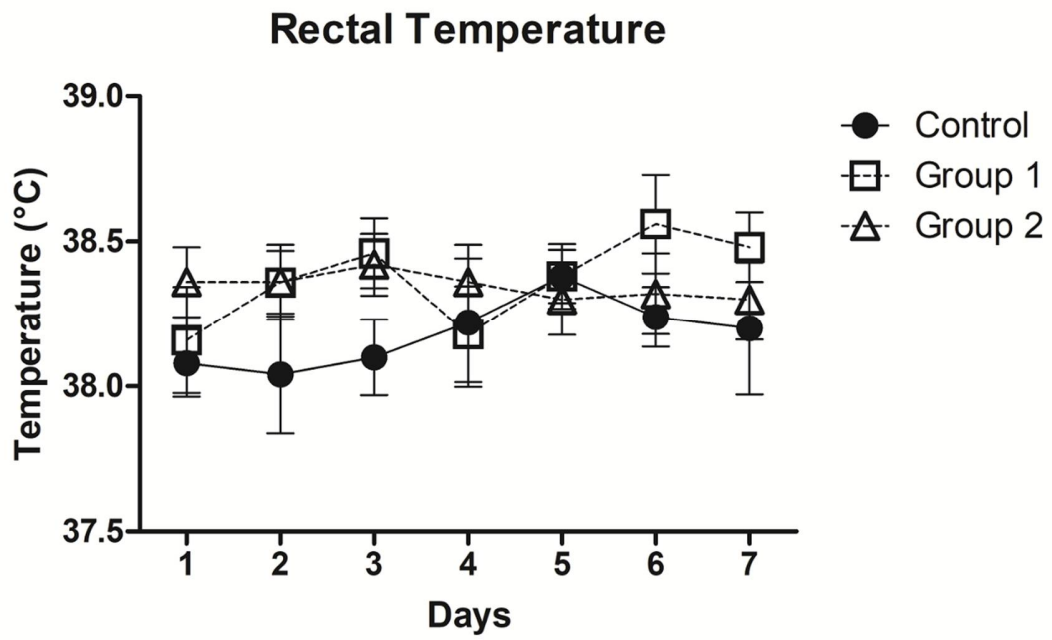

**Figure S4.** Rectal temperature assay. The rectal temperature was measured daily for 7 days. Values are mean  $\pm$  SEM. n=5, Two-way ANOVA and Sidak test without significance different versus control group.



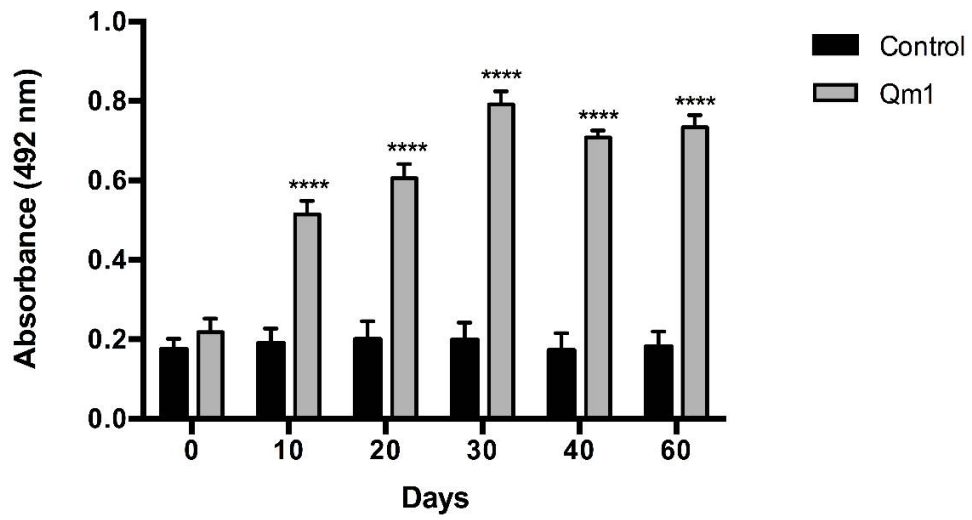

**Figure S5.** Response to Qm1 vaccination in pigs. Total IgG was measured by indirect ELISA, using serum diluted 1:1000 at the indicated days. Values are mean  $\pm$  SEM. n=6, Two-way ANOVA and Sidak test \*\*\*\*p<0.0001 versus the control group
